# Supplementary material
Source: PubMed Central journal article supplement (PMC3534315)
Supplement: supp_0022155412467353_JHC467353_Supplemental_Material.pdf [file supp_0022155412467353_JHC467353_Supplemental_Material.pdf]

**Supplementary Material**

**Identification of the Protein Target of Myelin-Binding Ligands by**

**Immunohistochemistry and Biochemical Analyses**

Anshika Bajaj<sup>1</sup>, Nicole E. LaPlante<sup>1</sup>, Victoria E. Cotero<sup>1</sup>, Kenneth M. Fish<sup>1,3</sup>, Roger M. Bjerke<sup>2</sup>,

Tiberiu Siclovan<sup>1</sup>, and Cristina A. Tan Hehir<sup>1</sup>

<sup>1</sup>GE Global Research, One Research Circle, Niskayuna, NY 12309

<sup>2</sup>GE Healthcare, Varemottak, Sandakerveien 105, N-0484 Oslo, Norway

<sup>3</sup>present address: Mount Sinai School of Medicine, 1 Gustave Levy Place Box 1030, New York, NY 10029

Correspondence to:

Cristina A. Tan Hehir, Ph.D.

GE Global Research

One Research Circle, K1-5B63A

Niskayuna, NY 12309

Phone: 518-387-7143; FAX: 518-387-7765

Email: [tanhehir@research.ge.com](mailto:tanhehir@research.ge.com)

**Bajaj et al.  
Supplementary  
Figure 1**

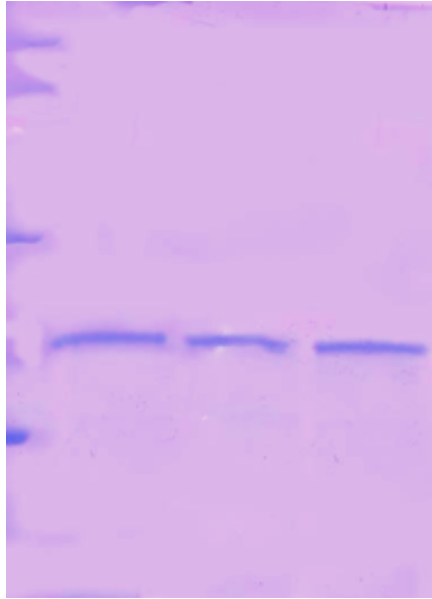

← **MBP**

Supplementary Figure 1. Purity of native MBP used in fluorescence polarization experiments as detected by 15% SDS Polyacrylamide gel. The first lane contains the molecular weight markers, while the next three lanes contain the purified MBP.

**Bajaj et al.**  
**Supplementary**  
**Figure 2**

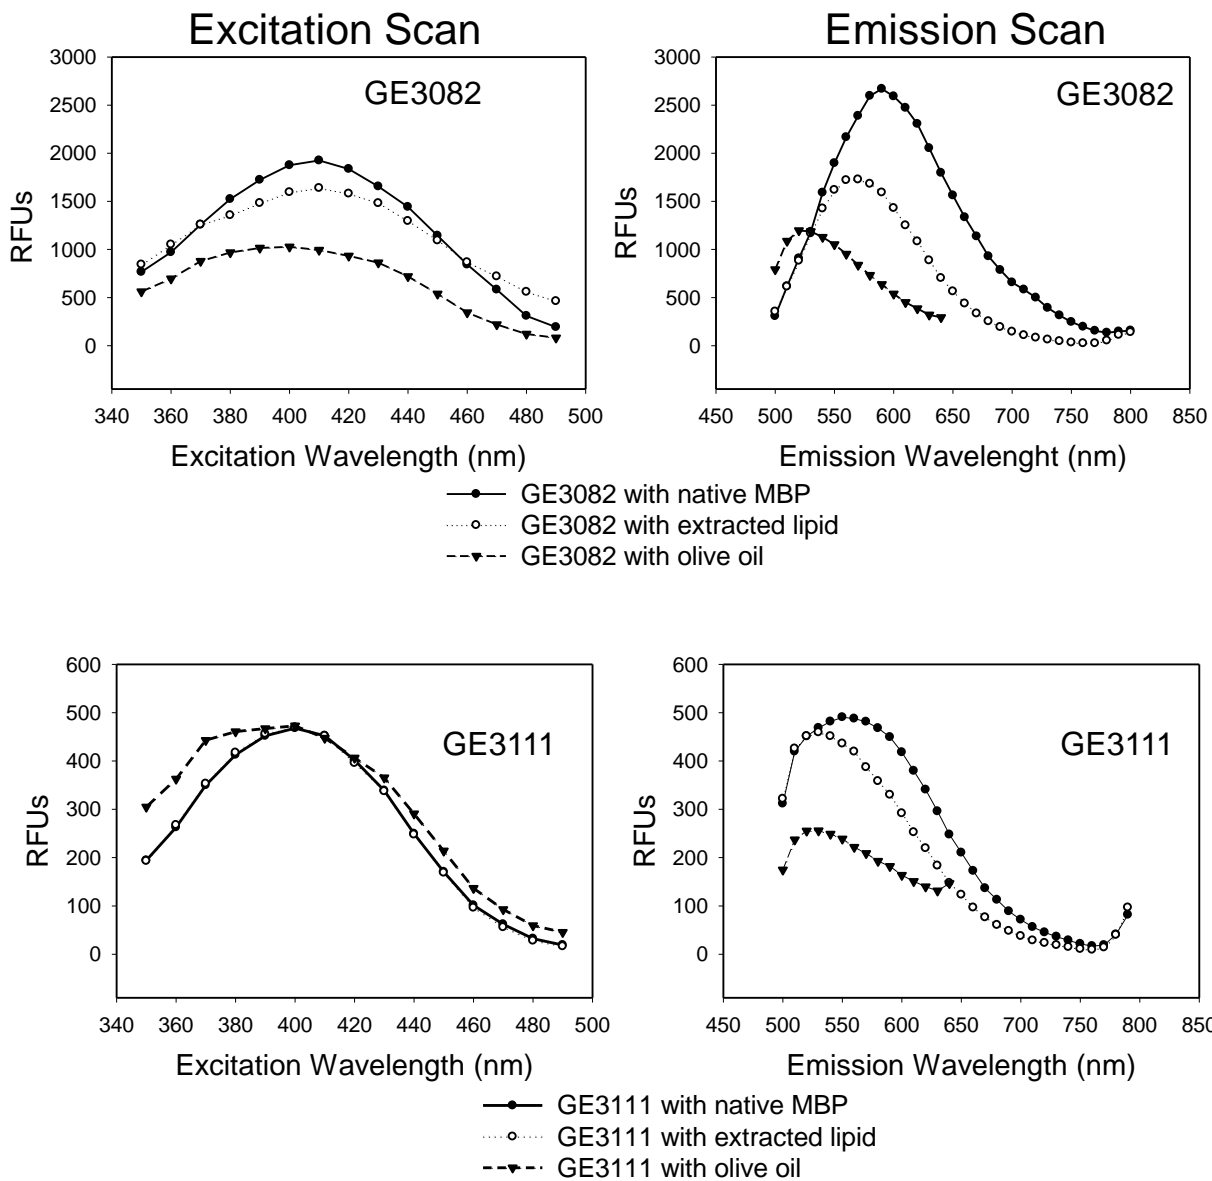

Supplementary Figure 2. Excitation and emission spectra of 10  $\mu\text{M}$  GE3082 (top) and 10  $\mu\text{M}$  GE3111 (bottom) in the presence of native MBP, extracted lipid and olive oil. 10  $\mu\text{M}$  fluorophore was mixed with 1.6  $\mu\text{M}$  native MBP or 1.6  $\mu\text{M}$  extracted lipid or 50% olive in the FP binding buffer (0.25% CHAPS in 20 mM Tris, pH 7.5). The reagents were incubated for 10 min at room temperature in a 96-well plate after which the spectra were recorded using the fluorescence mode of Spectra Max M5 (Molecular Devices).

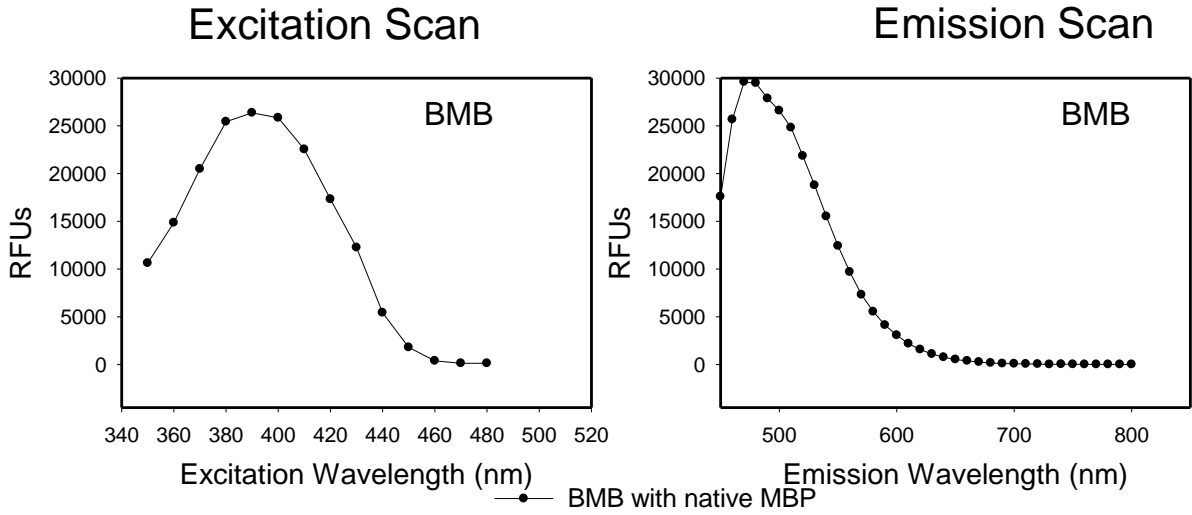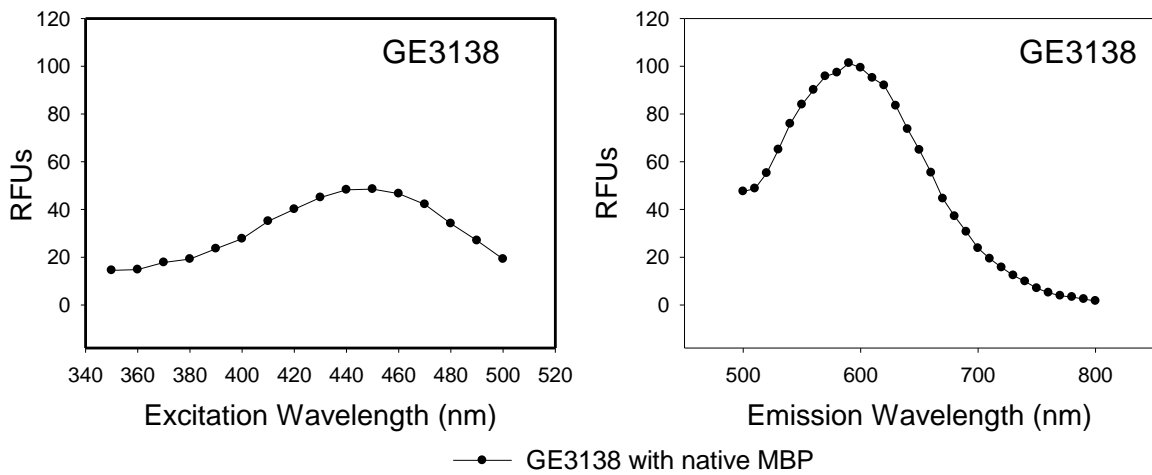

Supplementary Figure 3. Excitation and emission spectra of 10  $\mu\text{M}$  BMB and 10  $\mu\text{M}$  GE3138 in the presence of native MBP. 10  $\mu\text{M}$  fluorophore was mixed with 1.6  $\mu\text{M}$  native MBP in the FP binding buffer. The reagents were incubated for 10 min at room temperature in a 96-well plate after which the spectra were recorded using the fluorescence mode of Spectra Max M5 (Molecular Devices).

**Bajaj et al.  
Supplementary  
Figure 4**

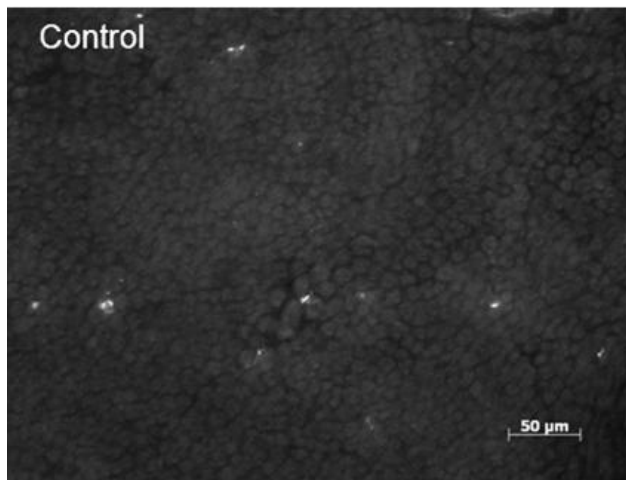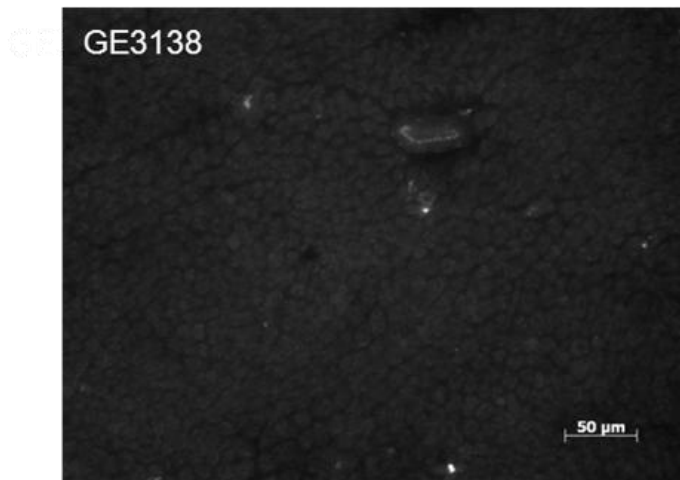



Supplementary Figure 4. Ex vivo staining of rat sciatic nerve section with GE3138 and a control nerve section that underwent the same experimental procedure but was not exposed to any fluorophores. GE3138 (with a final concentration of 10  $\mu$ M) was added onto the tissue in a buffer containing 10% Cremophor EL and 65% rat serum in PBS. The slides were incubated for 1 h in a dark, humid chamber after which they were washed with PBS (3 x 5 min), cover-slipped, and imaged using a custom filter cube (excitation filter: 460 nm with 60 nm band pass, emission filter: 630 nm with 92 nm band pass). A buffer only control (no GE3138) was also performed using exactly the same procedure to determine autofluorescence under the same settings.
